# Supplementary material for: Selection for Silage Yield and Composition Did Not Affect Genomic Diversity Within the Wisconsin Quality Synthetic Maize Population
Source: PubMed Central journal article supplement (PMC4390570; doi:10.1534/g3.114.015263), 2015-02-02
Supplement: supp_g3.114.015263_FigureS1.pdf [file supp_g3.114.015263_FigureS1.pdf]

### NDF

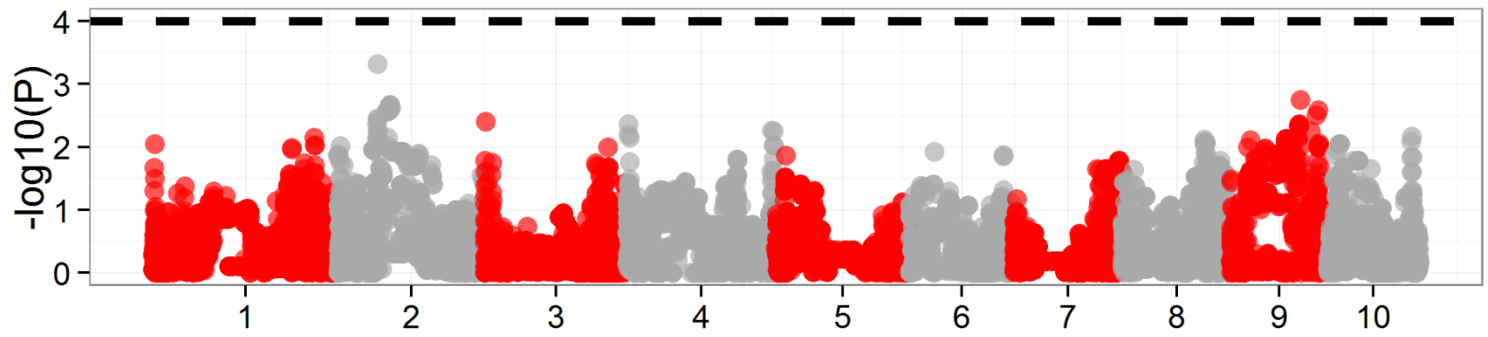

### CP

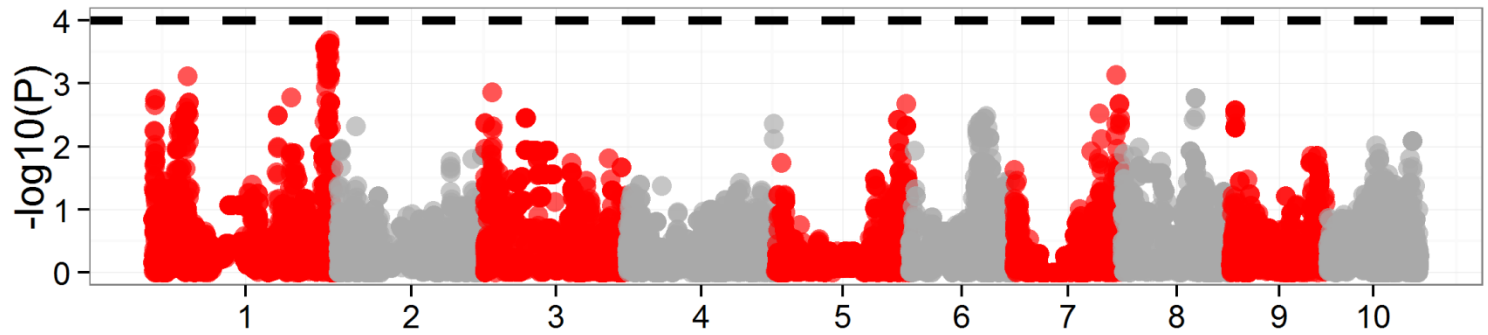

### IVD

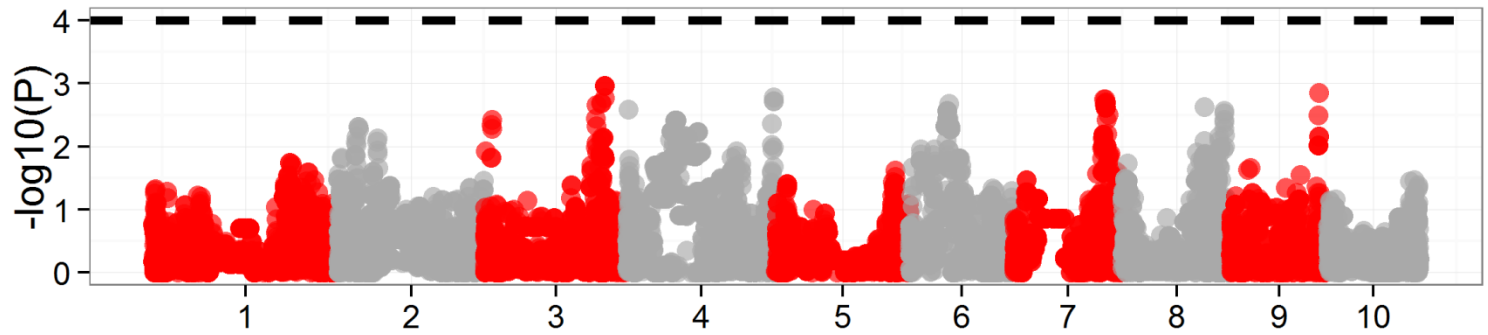

### STARCH

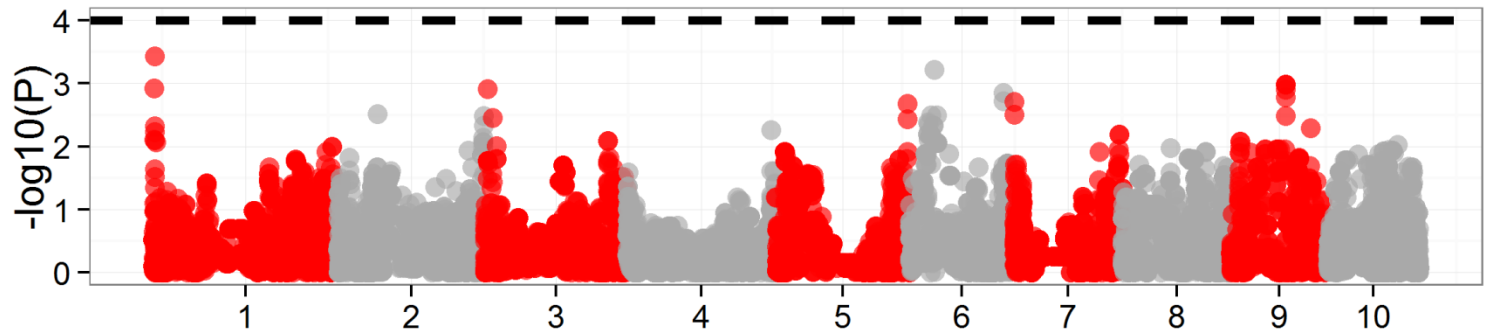

**Figure S1** Manhattan plots produced from an association analysis on silage compositional traits neutral detergent fiber (NDF), crude protein (CP), *in vitro* true digestibility (IVTD), and starch. Numbers along the x-axis represent the 10 chromosomes of maize. Dashed lines are placed at the arbitrary statistical threshold of  $P = 10^{-4}$ .
